# Supplementary material
Source: MDPI journal article supplement (https://www.mdpi.com/2073-4441/14/4/644)

Select a display:

Site Comparison

Select a parameter:

Dissolved Oxygen (mg/L)

Select a comparison parameter:

pH

Date range:

2011-02-10

2019-03-19 — 2019-11-10

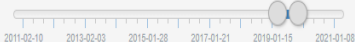

This is an interactive plot.

Hover over the plot, and use the icons to interact with it.

Use the magnifying glass icon to draw a zoom box.

Use the house icon to reset the axes of the plot.

Select any combination of legend elements by clicking on them.

656932-Newburgh Probe 656990-Markland Probe cannerton iron-ton markland meldahl olmstead pike\_island

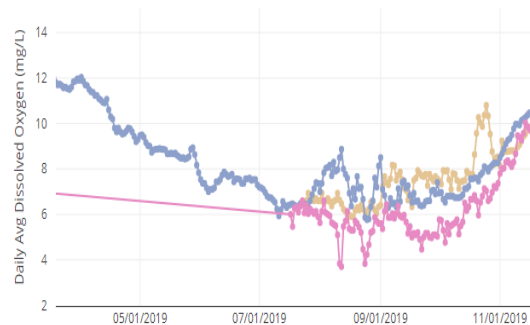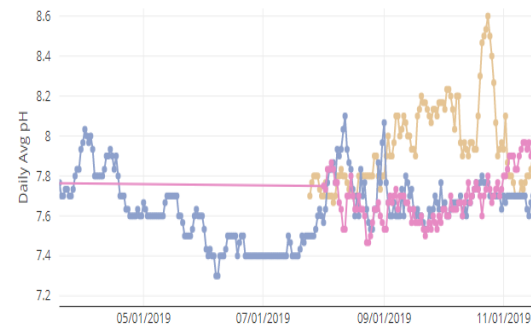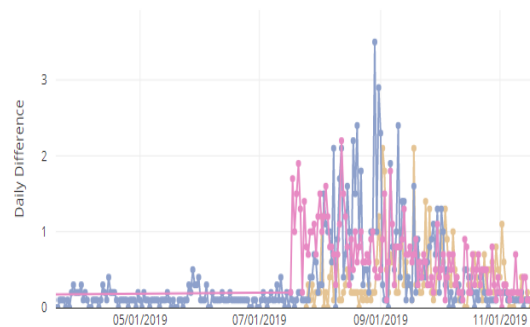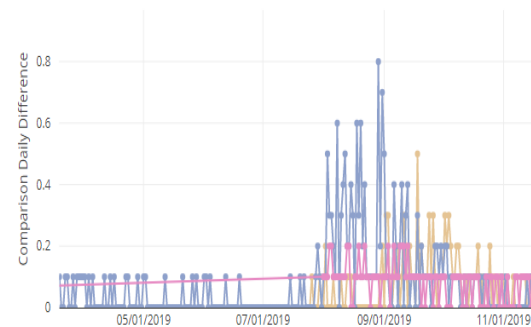

Supplement: s1 [file s1]
