# Supplementary material
Source: MDPI journal article supplement (https://www.mdpi.com/2073-4441/14/4/644)

Select a site:

Meldahl

Select a display:

Discharge (cfs)

Graph View

☐ Grid

☒ Stacked

This is an interactive plot.

Hover over the plot, and use the icons to interact with it.

Use the magnifying glass icon to draw a zoom box.

Use the house icon to reset the axes of the plot.

Select any combination of legend elements by clicking on them.

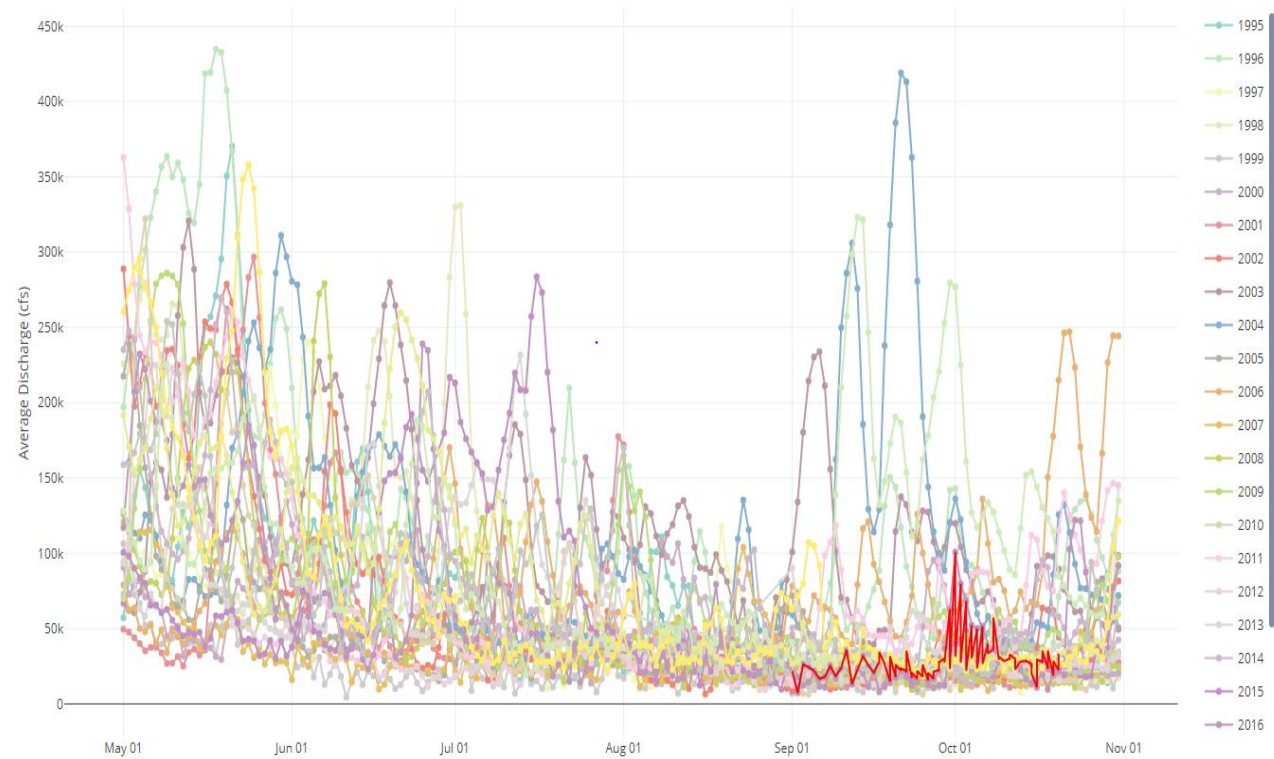

Supplement: s1 [file s1]
