# Supplementary material
Source: MDPI journal article supplement (https://www.mdpi.com/2073-4441/14/4/644)

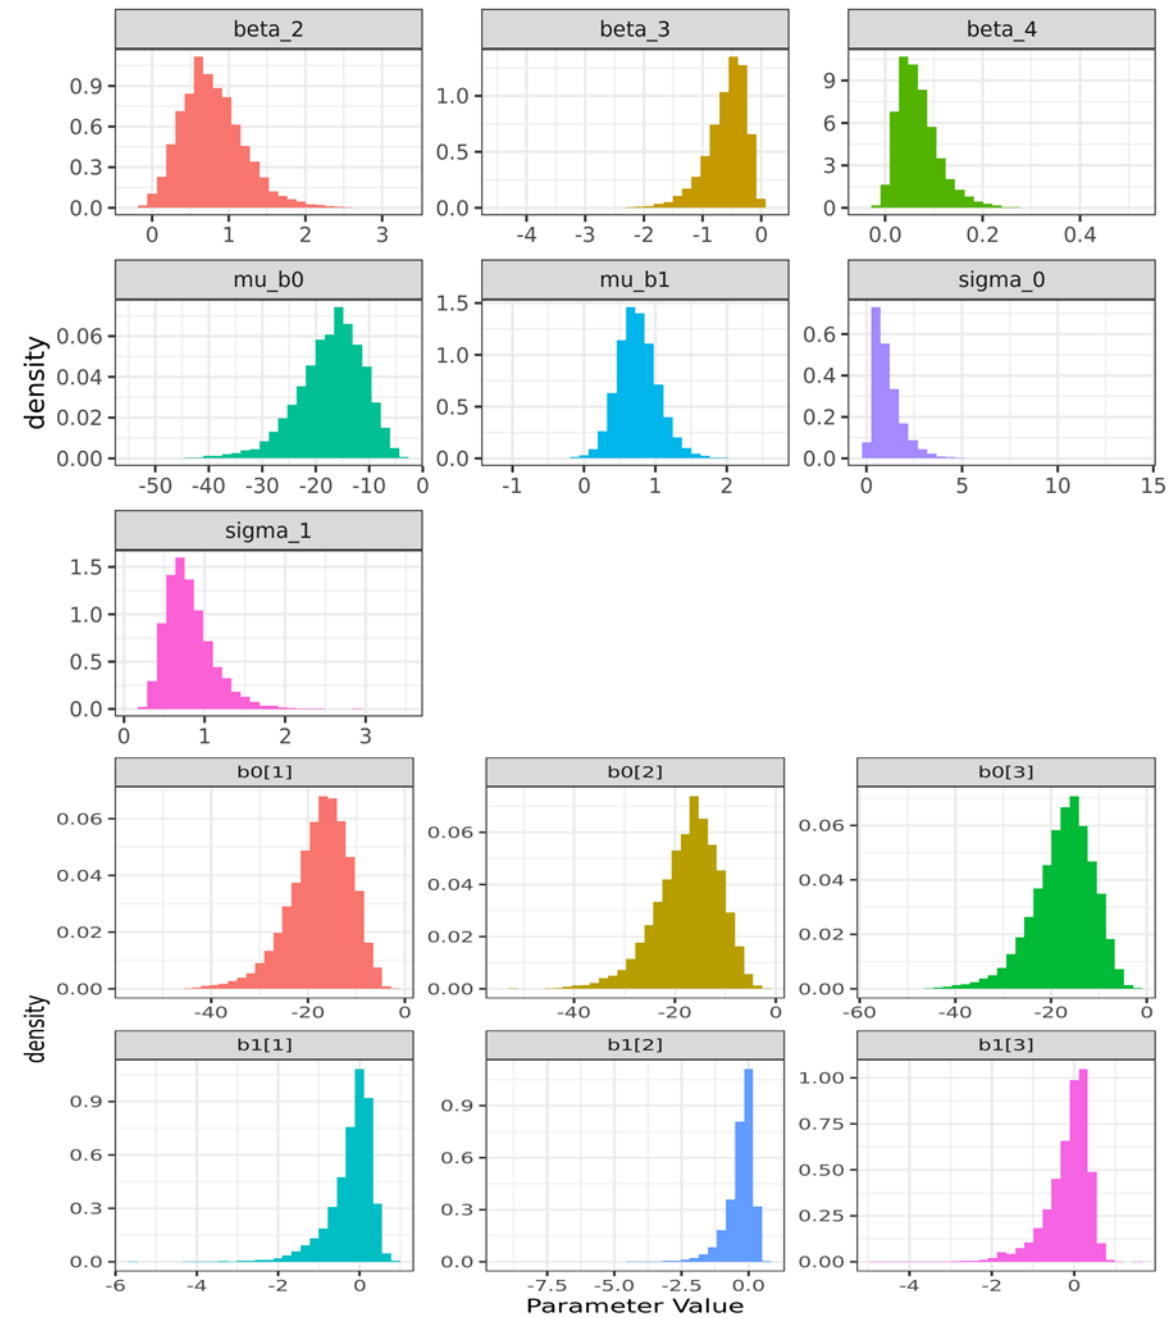

Supplement: s1 [file s1]

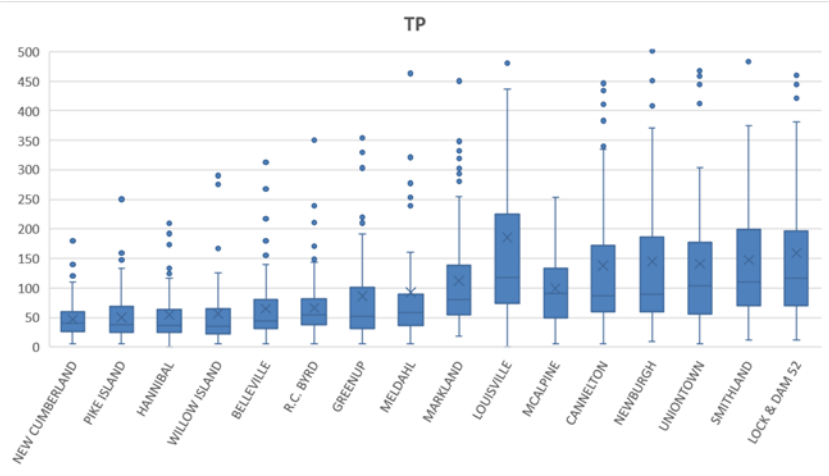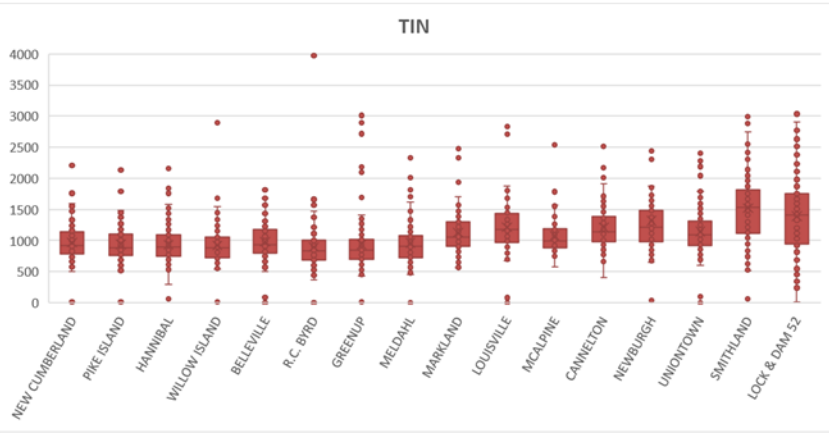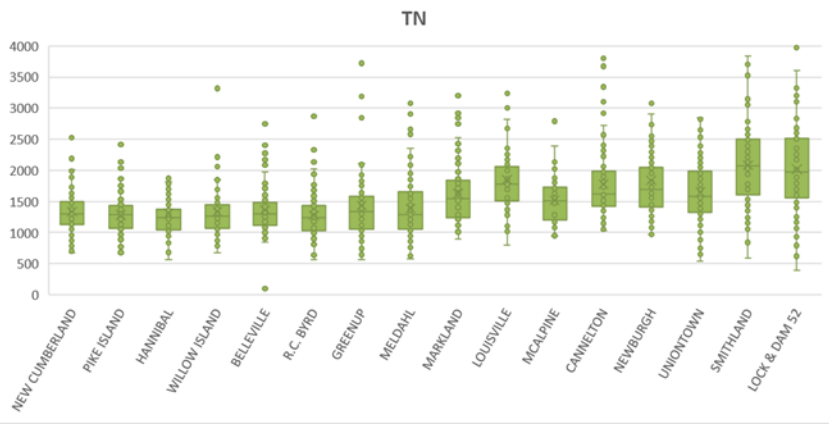

Supplement: s1 [file s1]

(a) Meldahl L&D Upper Pool

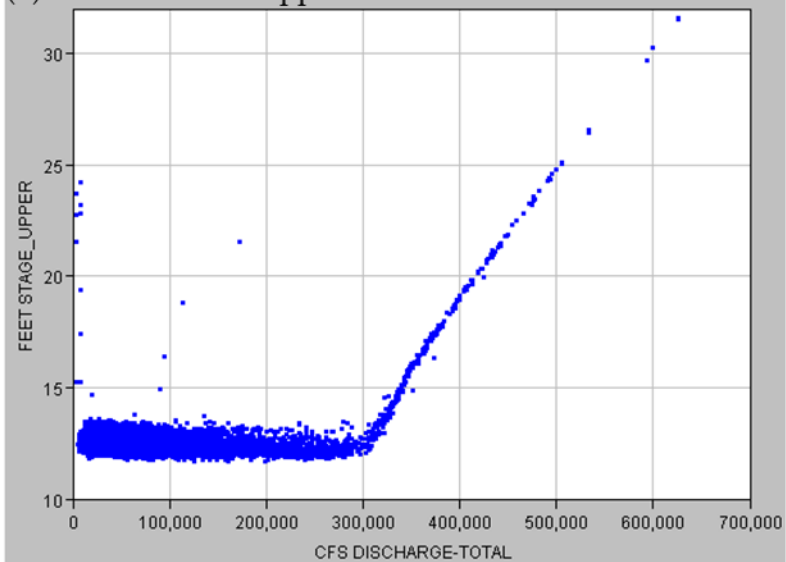

(b) Meldahl L&D Tailwater

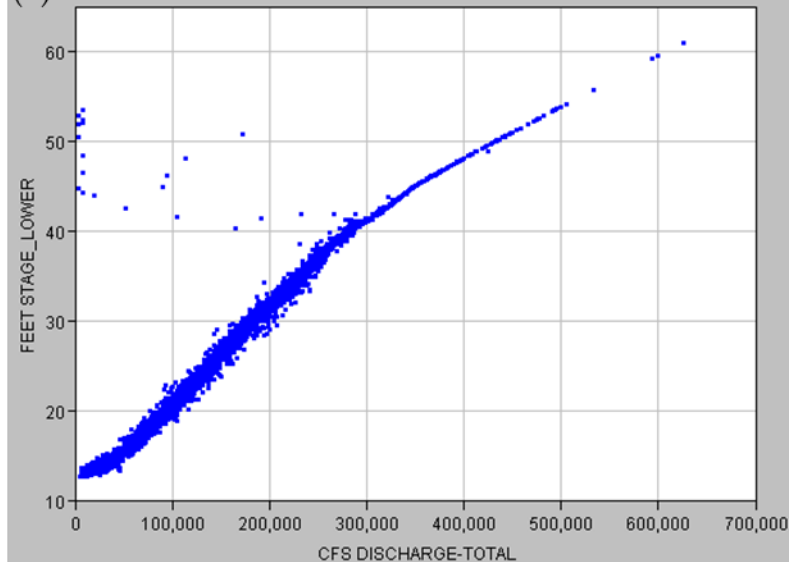

(c) Cincinnati

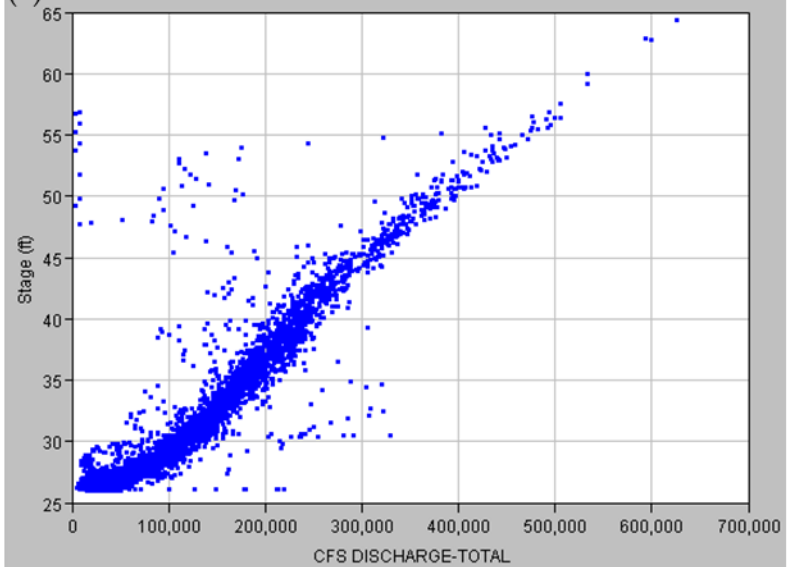

Supplement: s1 [file s1]

462 rm  
463 rm  
464 rm  
465 rm  
466 rm  
467 rm  
467.5 rm  
468 rm  
469 rm  
470 rm  
471 rm  
472.5 rm

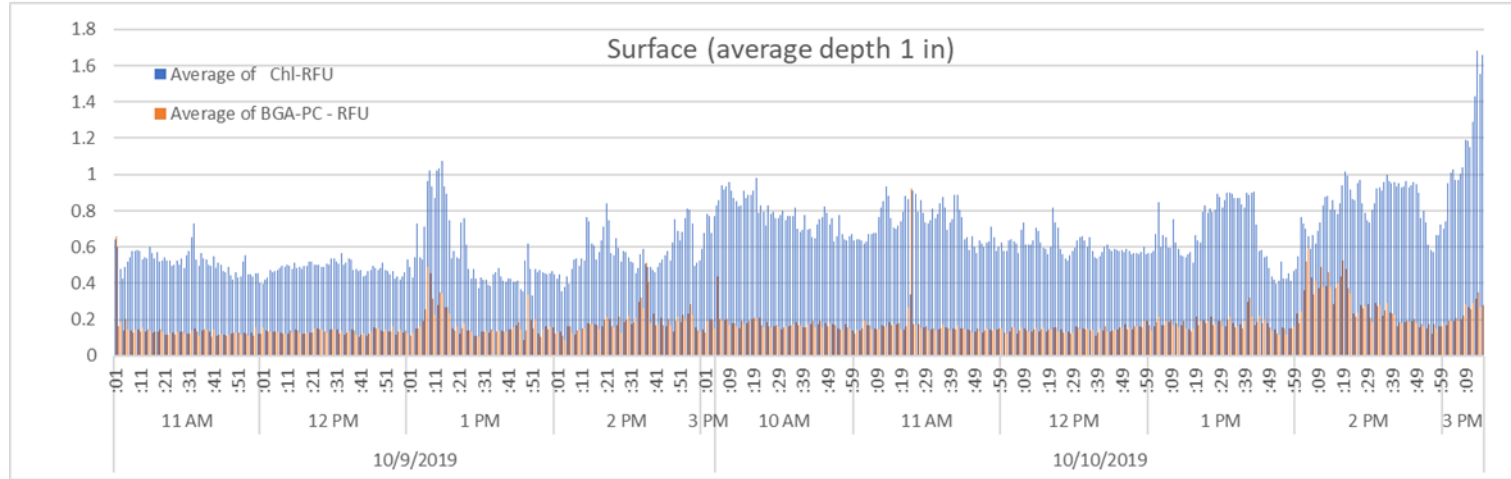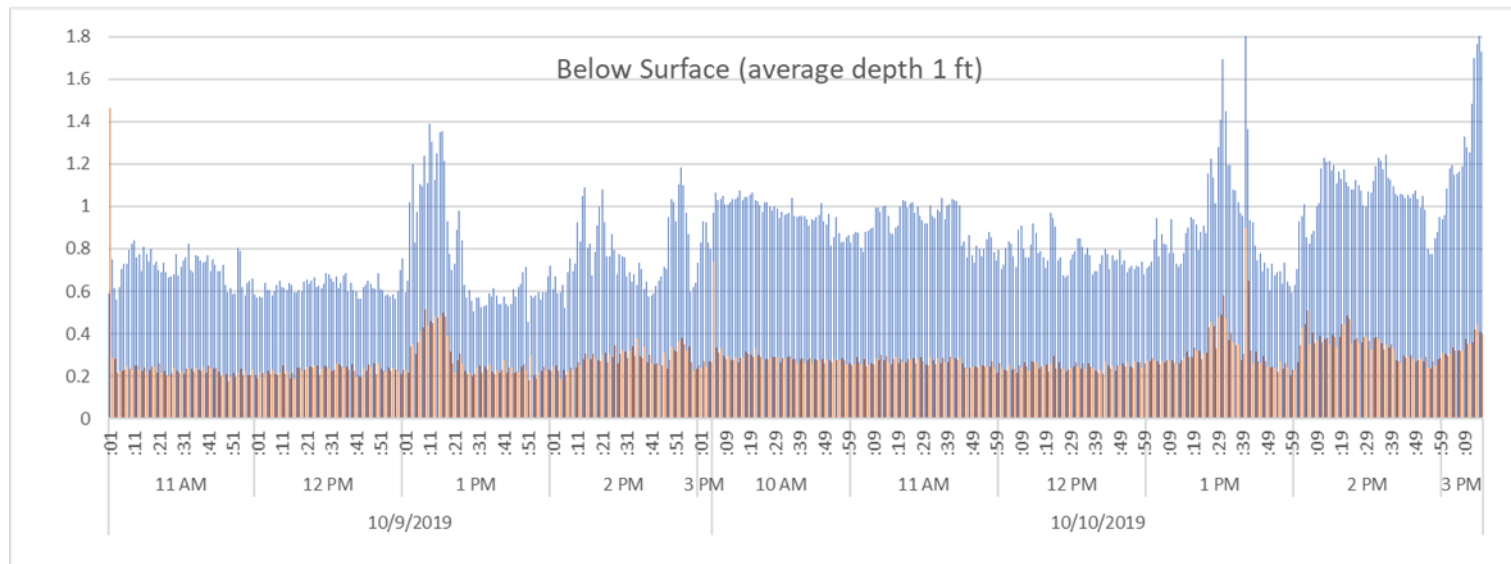

Supplement: s1 [file s1]

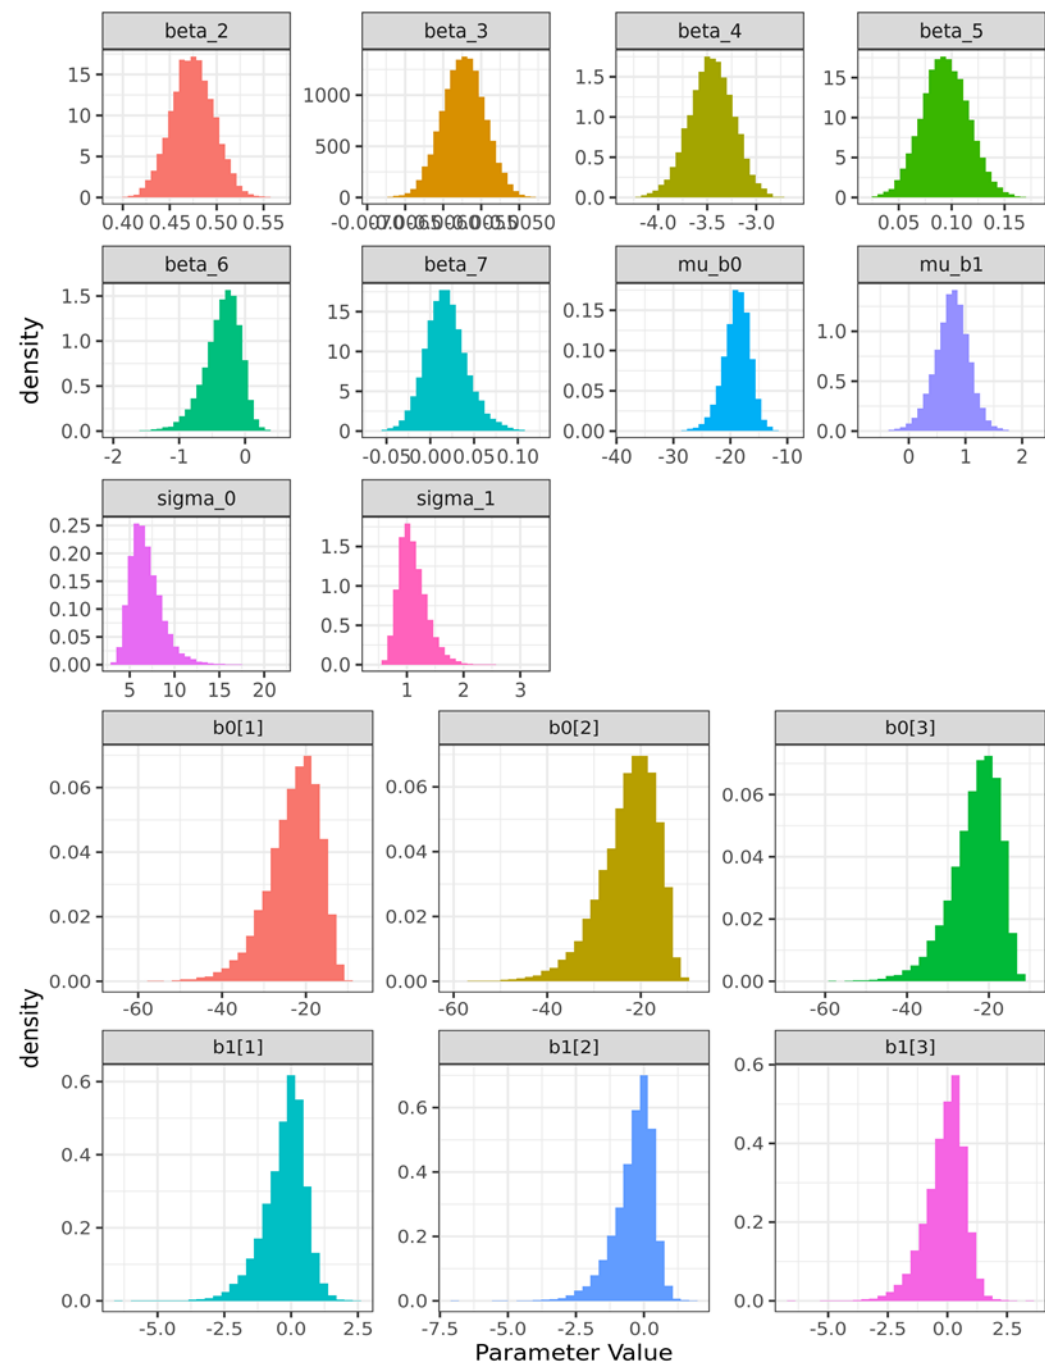

Supplement: s1 [file s1]

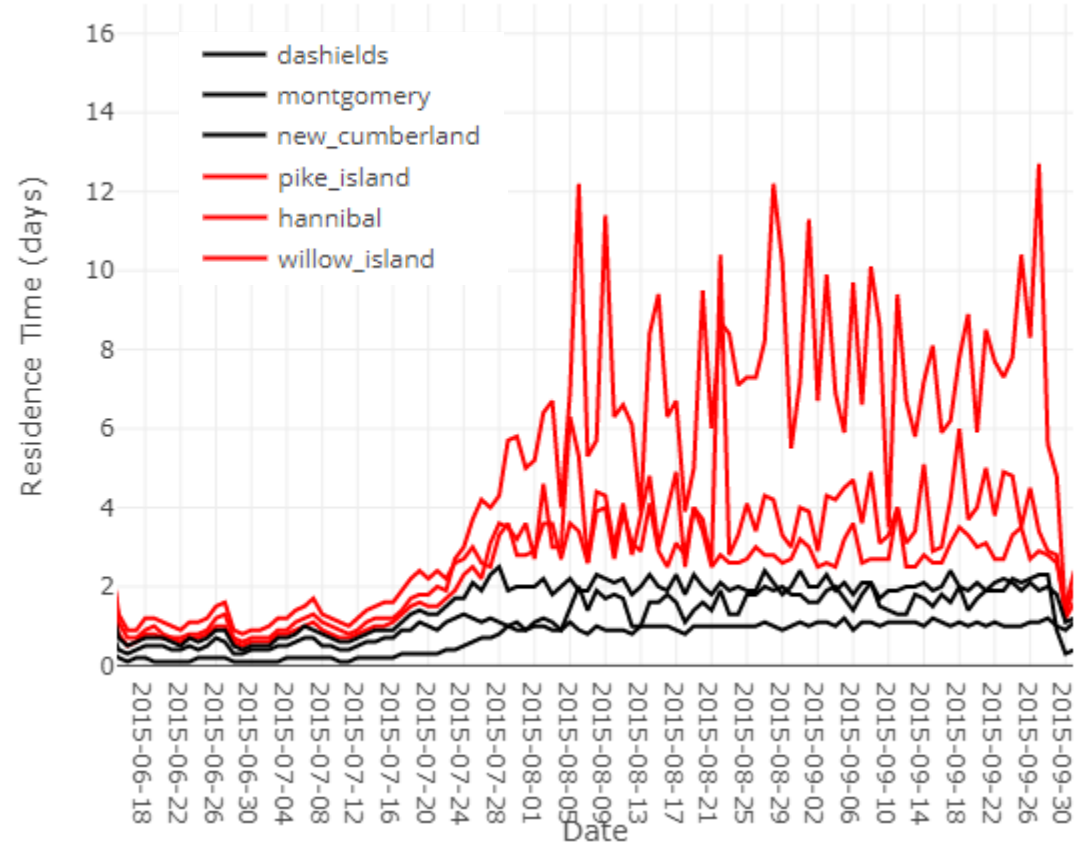

Supplement: s1 [file s1]

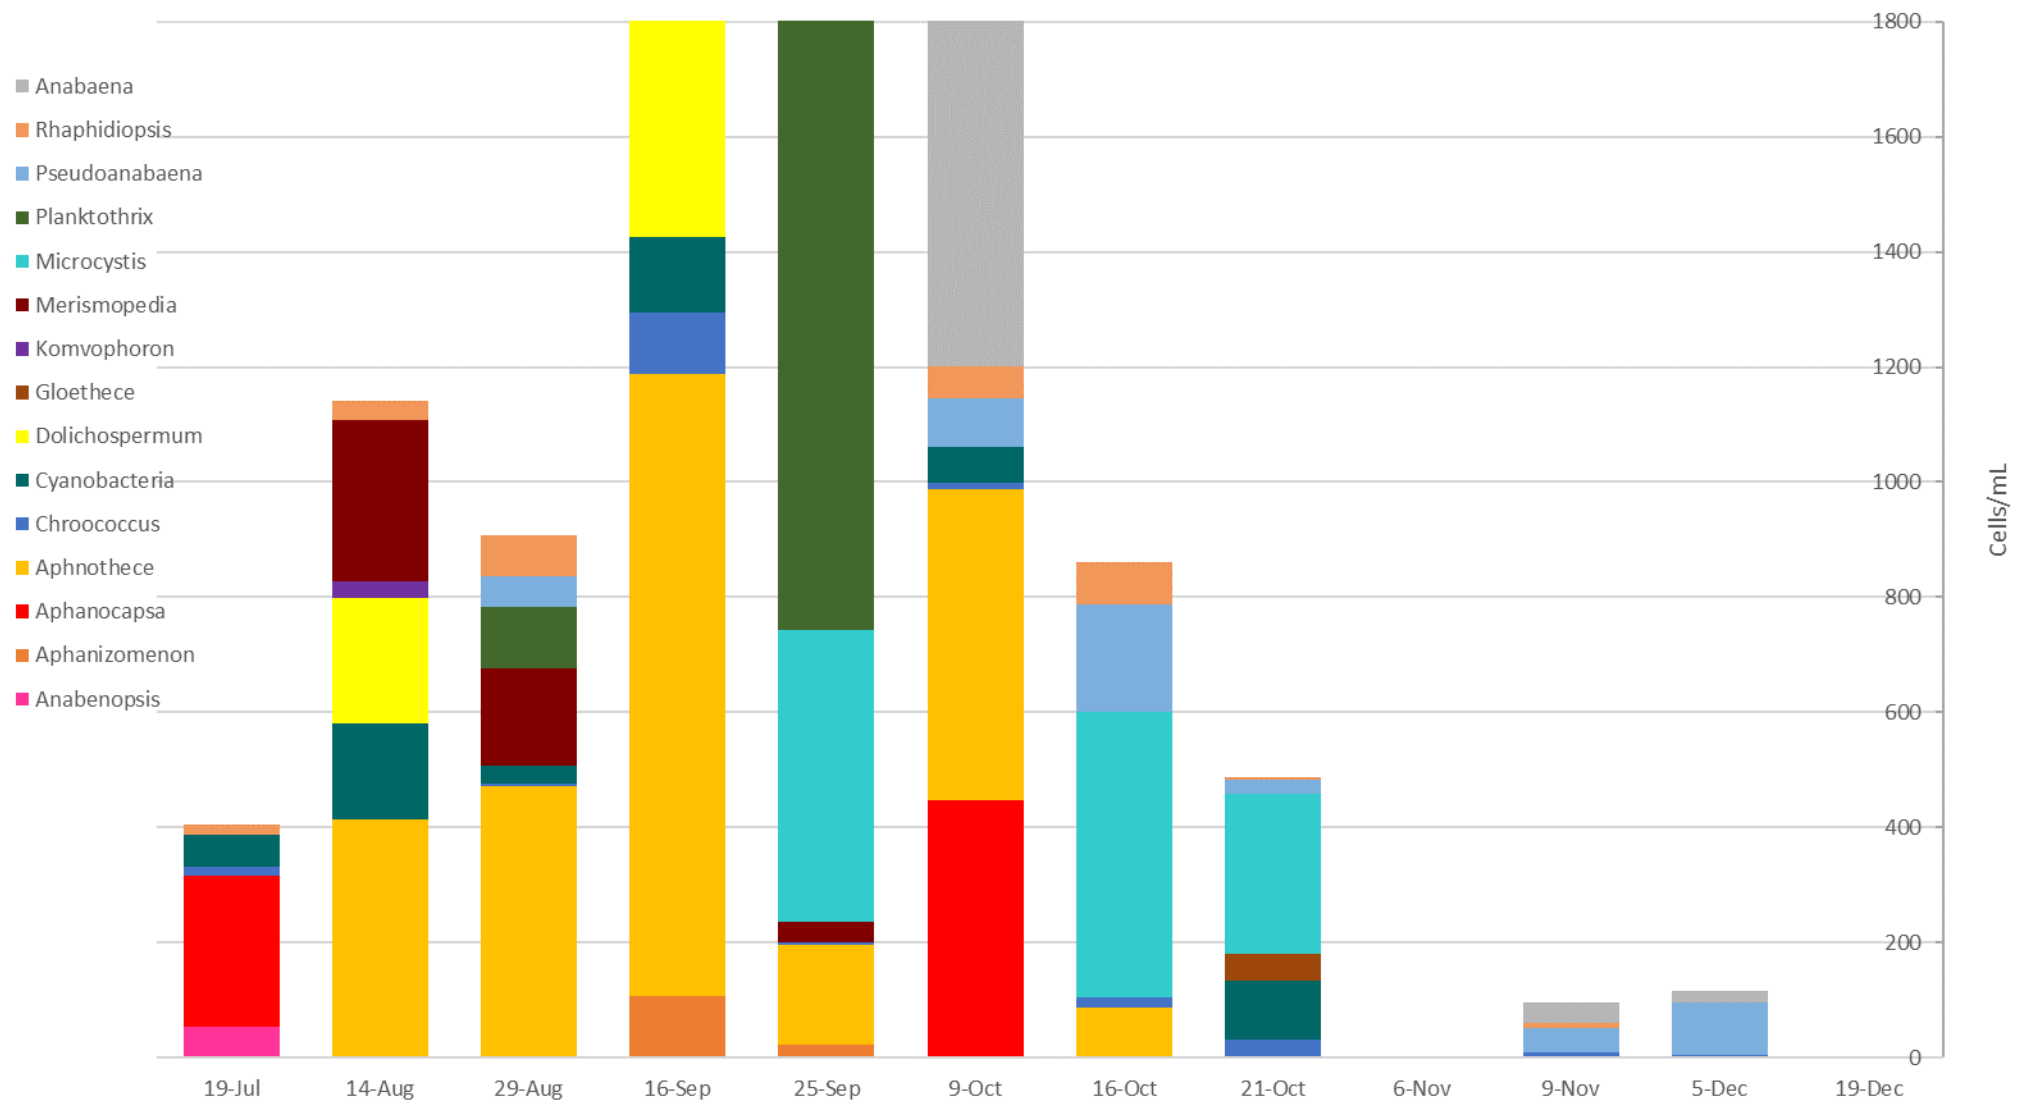

Supplement: s1 [file s1]

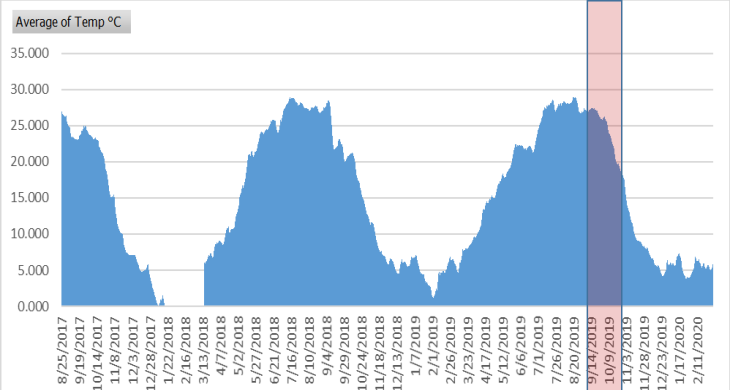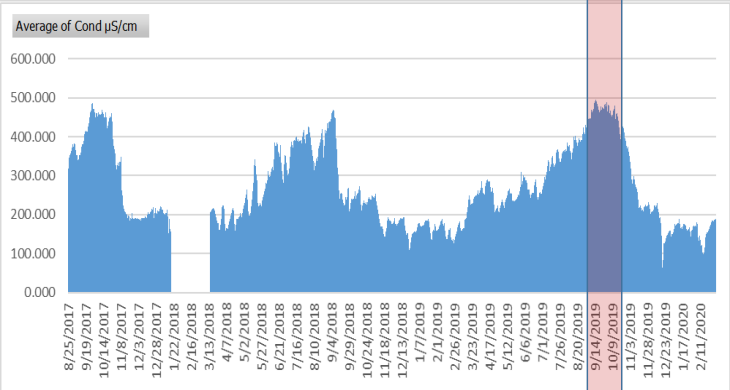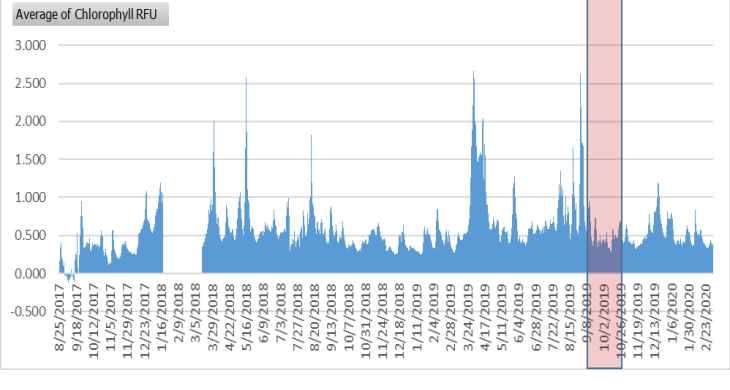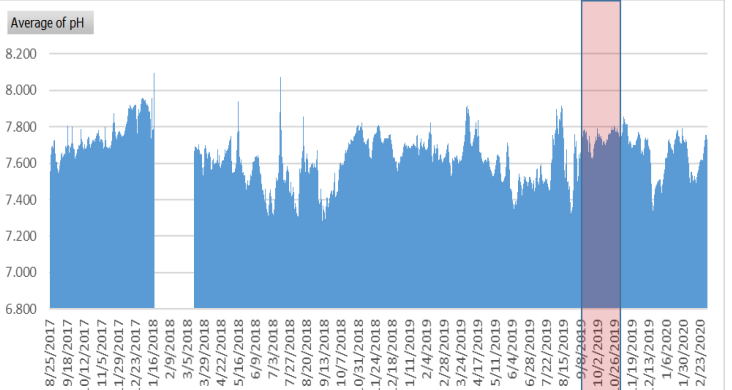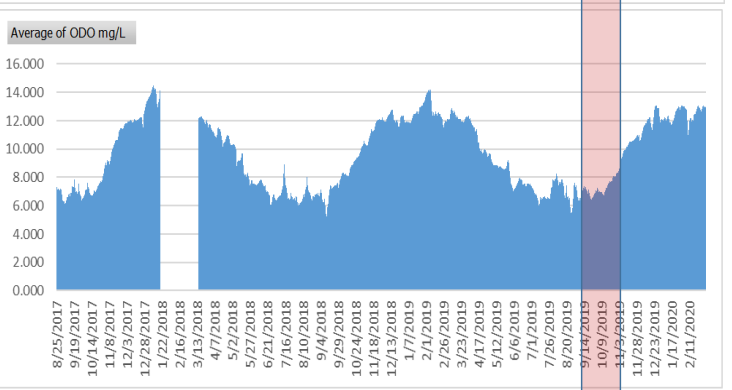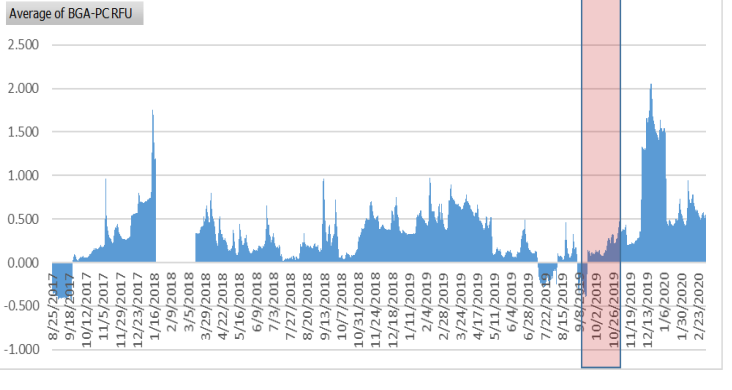

Supplement: s1 [file s1]

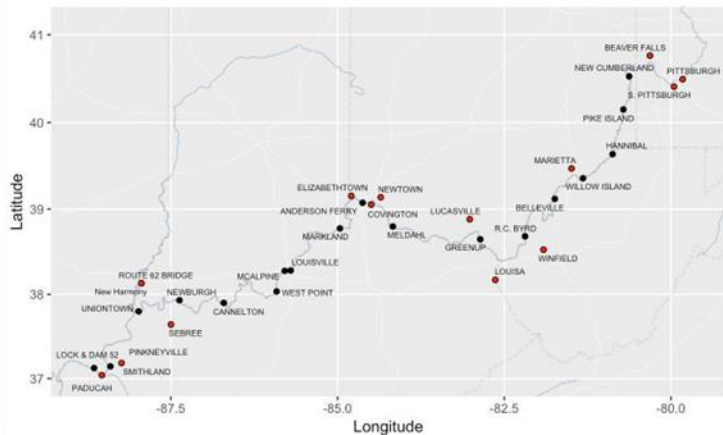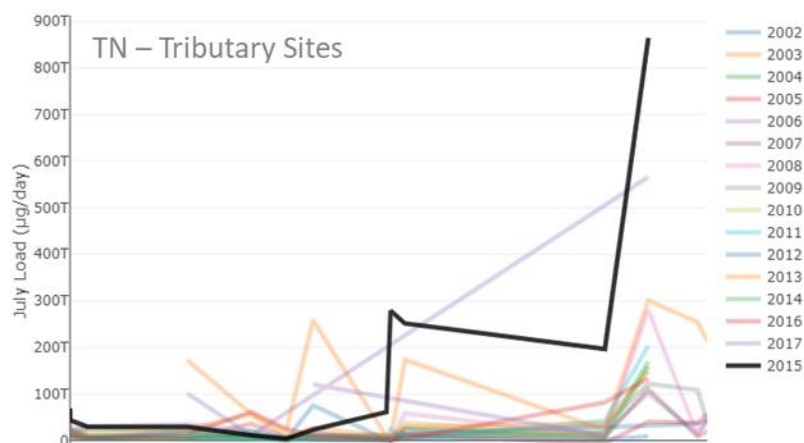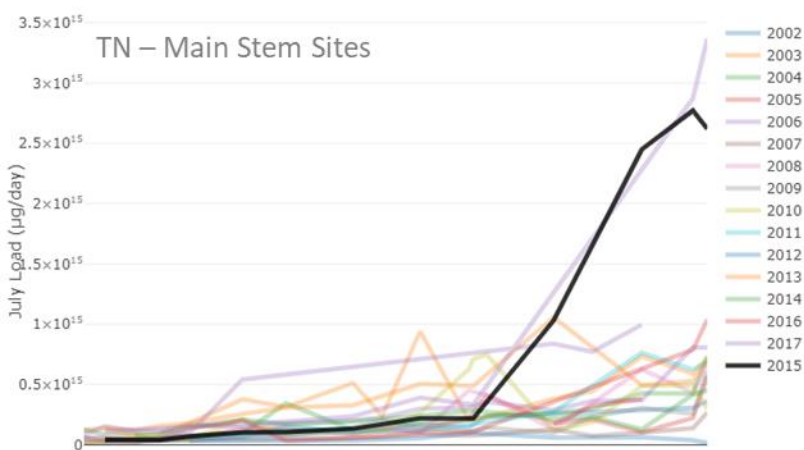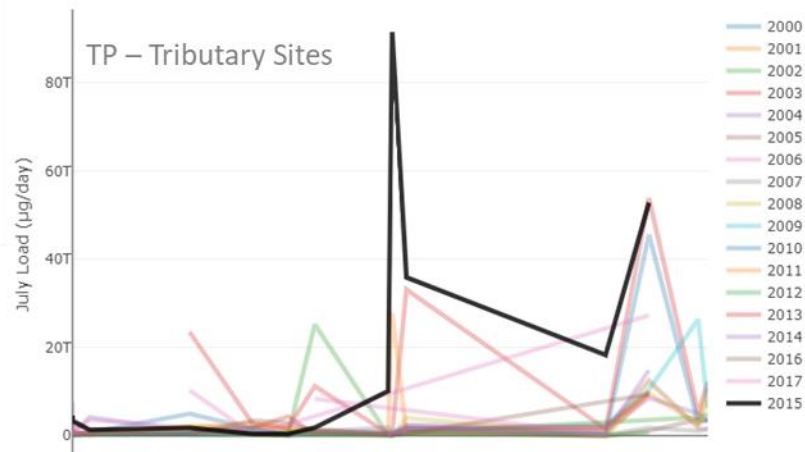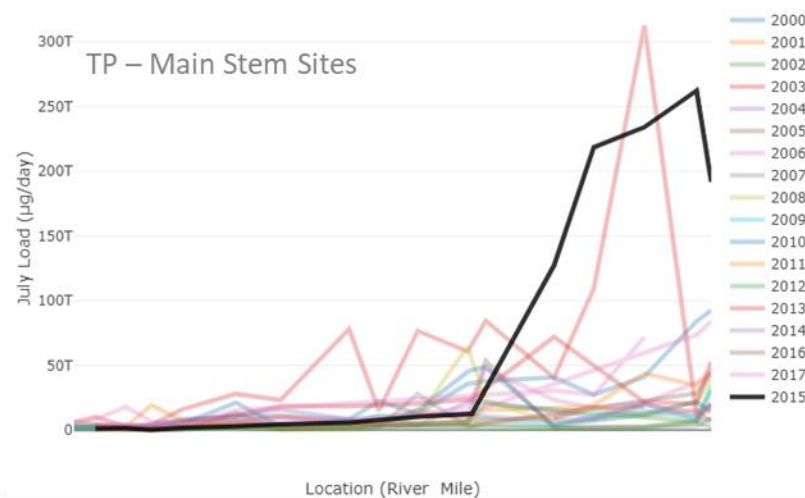

Supplement: s1 [file s1]

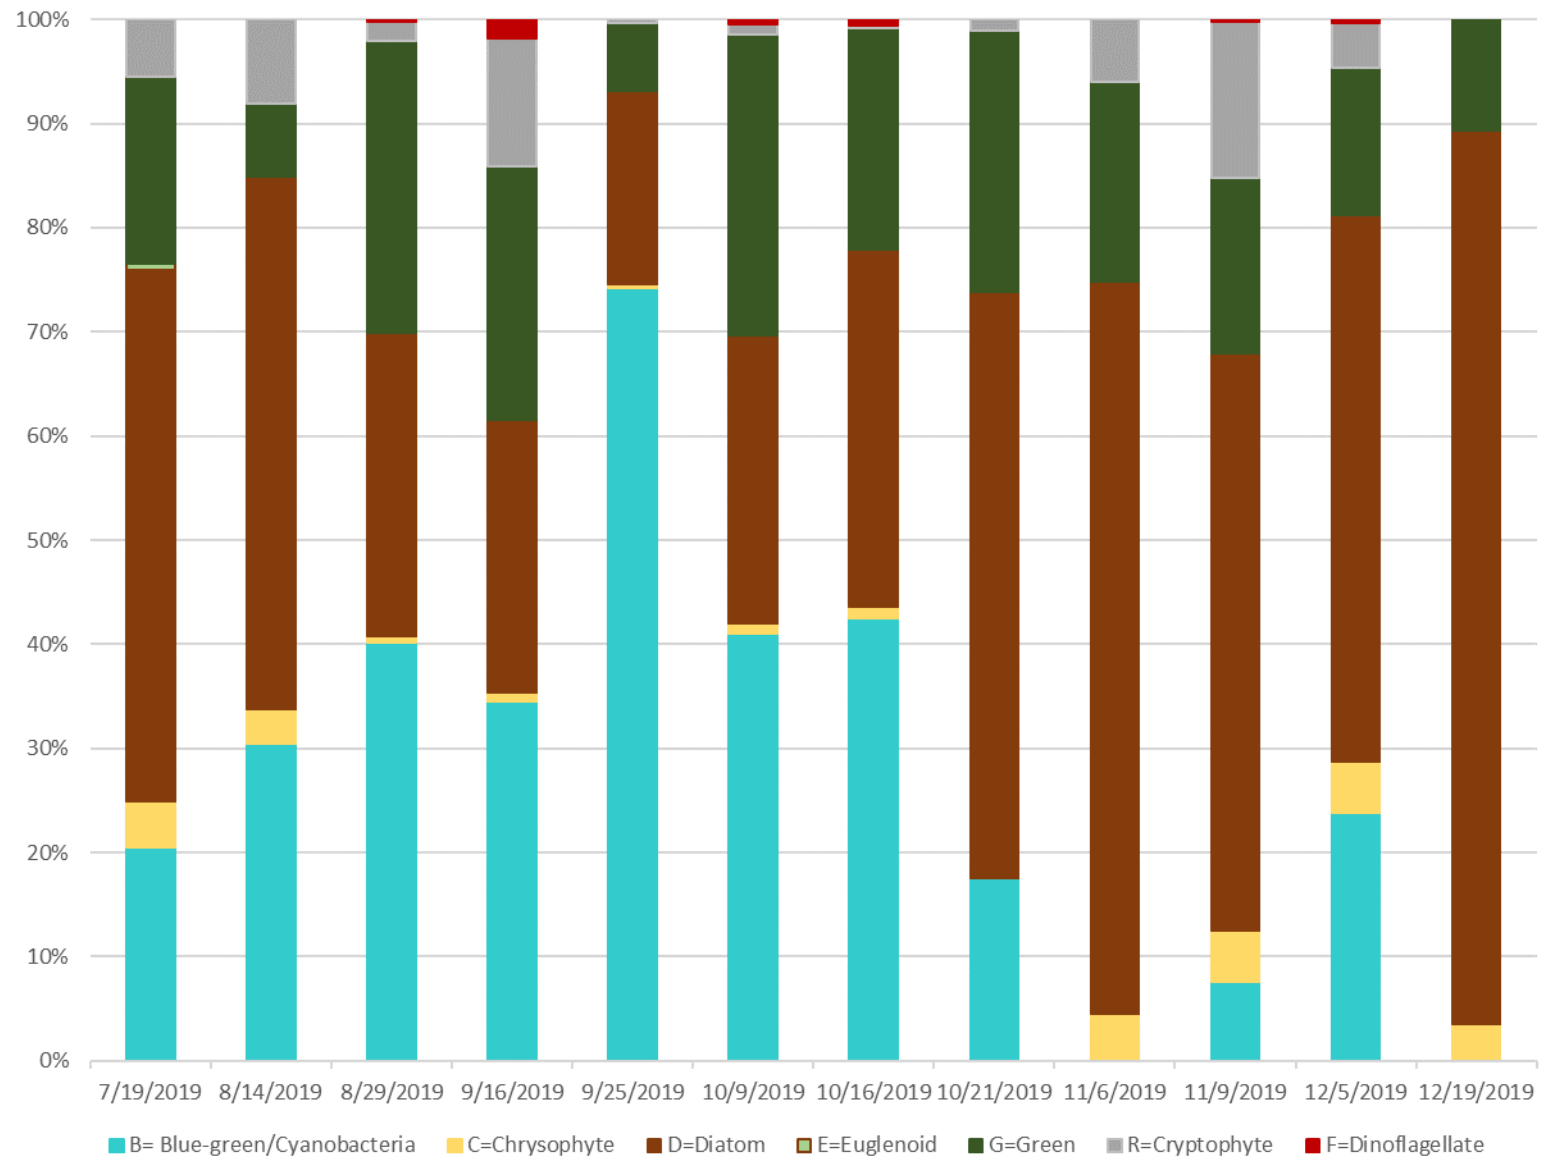

Supplement: s1 [file s1]

Parameter Value

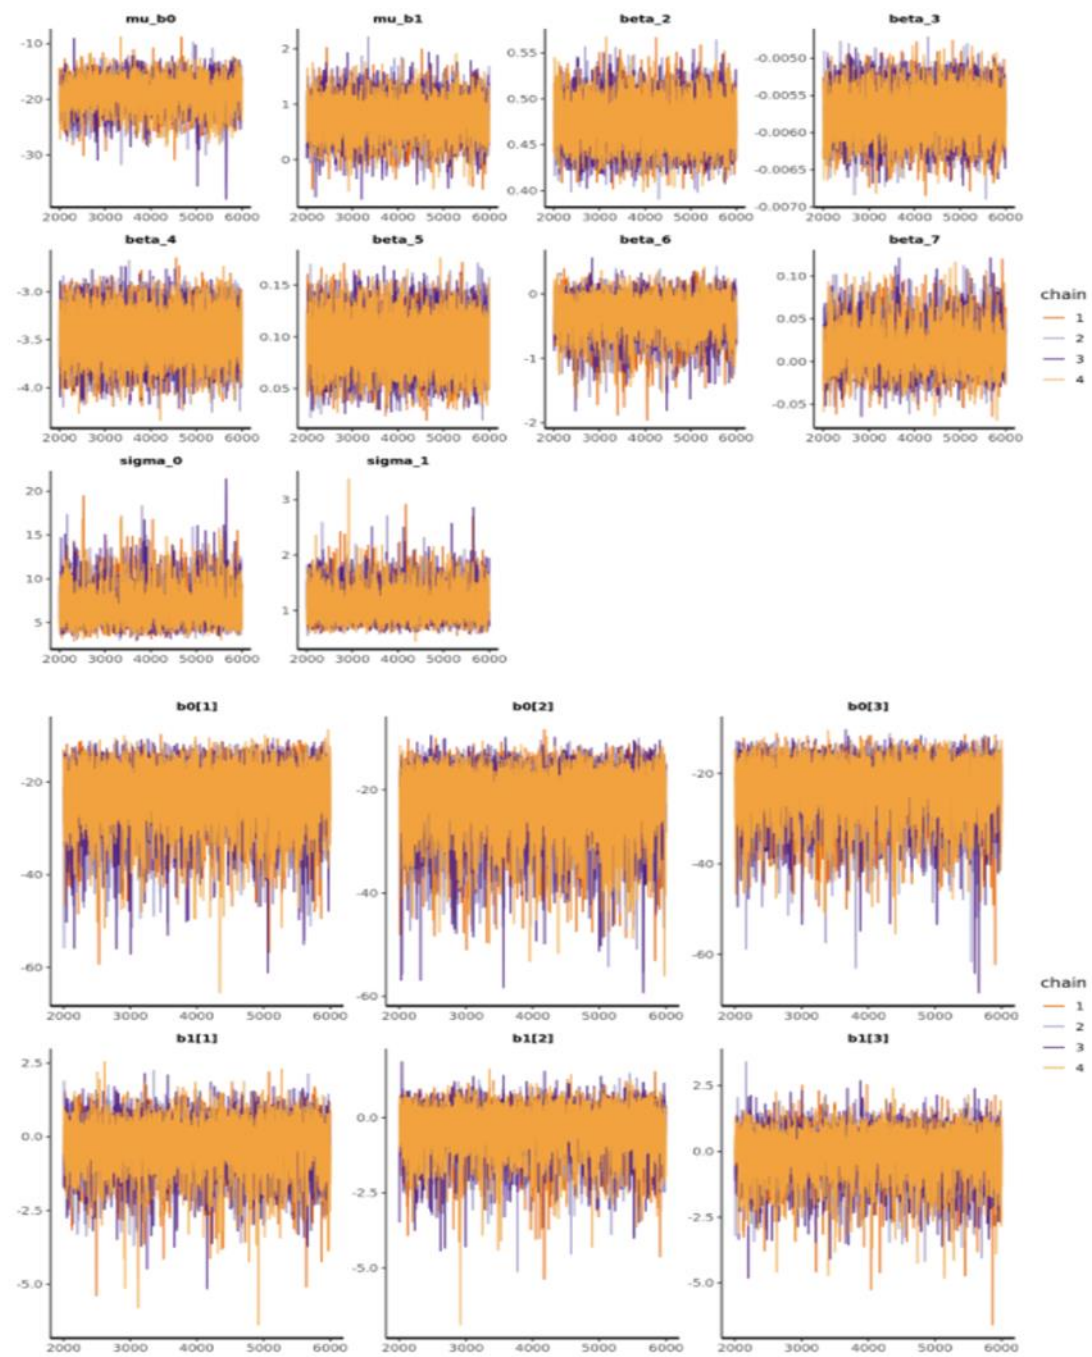

Draw Number

Supplement: s1 [file s1]

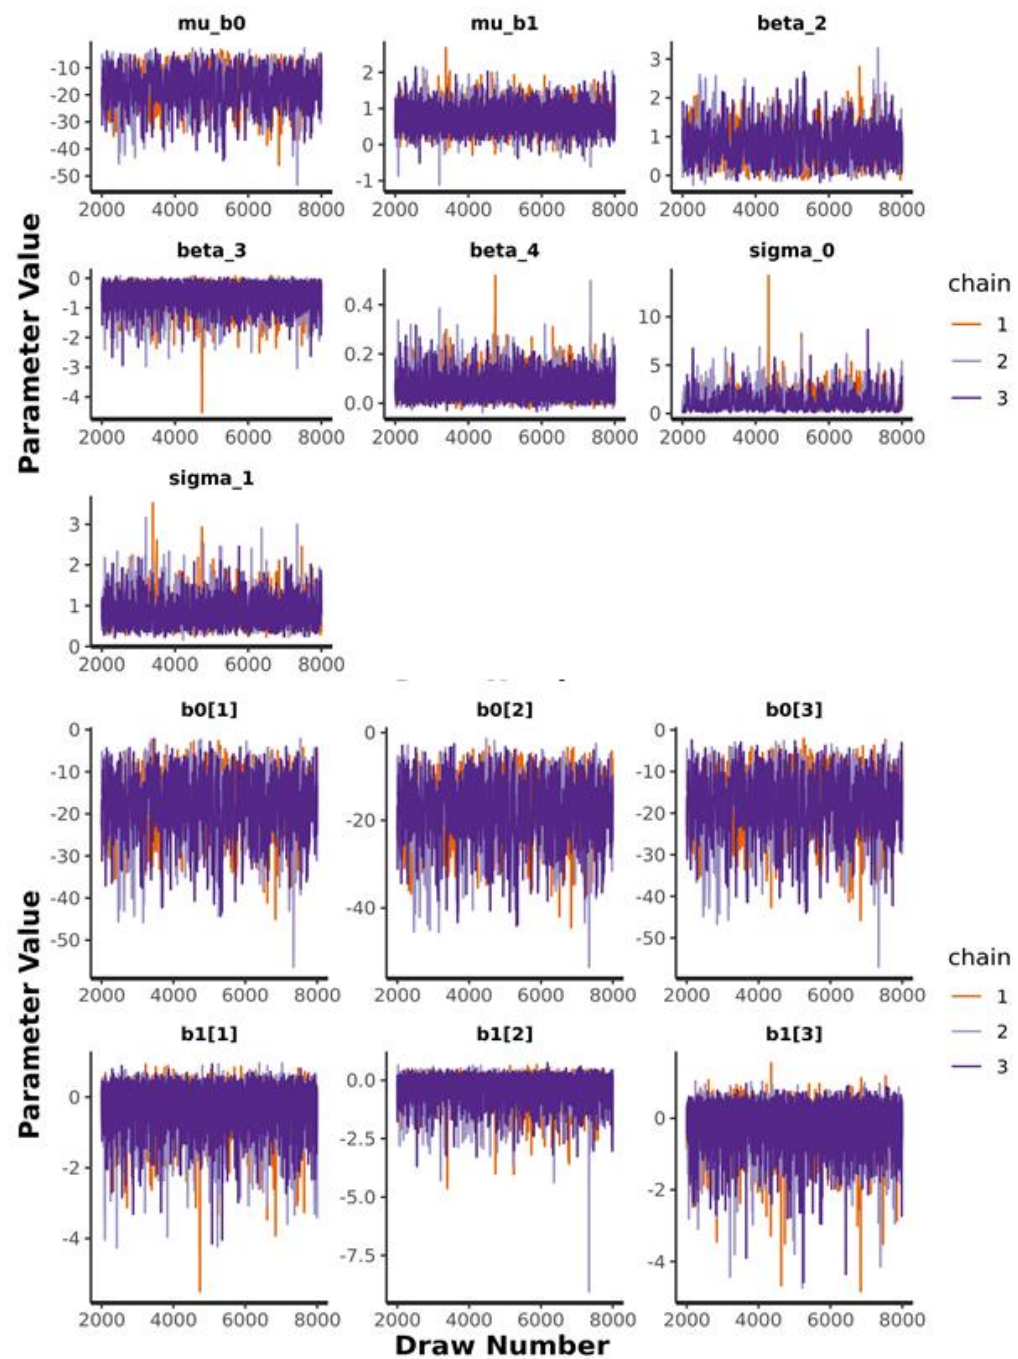

Supplement: s1 [file s1]

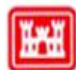

US Army Corps  
of Engineers  
Great Lakes & Ohio River Division

## Ohio River Mainstem Locks and Dams

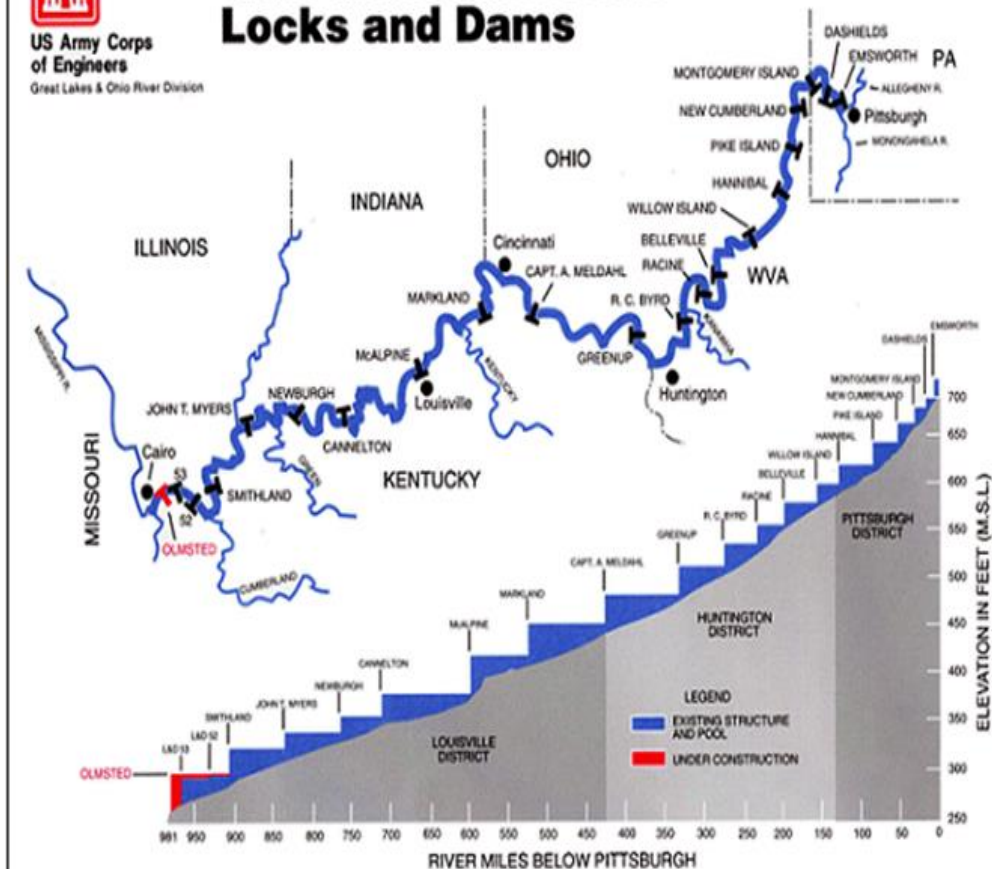

Supplement: s1 [file s1]
